1 **Title**

2 Stem cell therapy for skin regeneration using mesenchymal stem cells derived from the progeroid  
3 Werner syndrome-specific iPS cells

4

5 **Authors**

6 Shinichiro Funayama<sup>1</sup>, Hisaya Kato<sup>1,2\*</sup>, Hiyori Kaneko<sup>1,2</sup>, Kentaro Kosaka<sup>3,4</sup>, Daisuke Sawada<sup>1,5</sup>,  
7 Aki Takada-Watanabe<sup>1</sup>, Takuya Minamizuka<sup>1,2</sup>, Yusuke Baba<sup>1,6</sup>, Masaya Koshizaka<sup>1,2</sup>, Akira  
8 Shimamoto<sup>7</sup>, Yasuo Ouchi<sup>3,8</sup>, Atsushi Iwama<sup>9</sup>, Yusuke Endo<sup>10</sup>, Naoya Takayama<sup>3</sup>, Koji Eto<sup>3,11</sup>,  
9 Yoshiro Maezawa<sup>1,2</sup>, Koutaro Yokote<sup>1,2</sup>

10

11 **Affiliations**

12 <sup>1</sup>Department of Endocrinology, Hematology and Gerontology, Chiba University Graduate School  
13 of Medicine, Chiba, Japan

14 <sup>2</sup>Division of Diabetes, Metabolism and Endocrinology, Chiba University Hospital, Chiba, Japan

15 <sup>3</sup>Department of Regenerative Medicine, Chiba University Graduate School of Medicine, Chiba,  
16 Japan

17 <sup>4</sup>Department of Plastic, Reconstructive, and Aesthetic Surgery, Chiba University Graduate  
18 School of Medicine, Chiba, Japan

19 <sup>5</sup>Department of Pediatrics, Chiba University Graduate School of Medicine, Chiba, Japan

20 <sup>6</sup>Department of Medicine, Division of Diabetes, Endocrinology and Metabolism, Kimitsu Chuo

21 Hospital, Kisarazu, Chiba, Japan

22 <sup>7</sup>Department of Regenerative Medicine Research, Faculty of Pharmaceutical Sciences, Sanyo-

23 Onoda City University, Sanyo-Onoda, Yamaguchi, Japan

24 <sup>8</sup>Gene Expression Laboratory, Salk Institute for Biological Studies, La Jolla, CA, USA

25 <sup>9</sup>Division of Stem Cell and Molecular Medicine, Center for Stem Cell Biology and Regenerative

26 Medicine, The Institute of Medical Science, The University of Tokyo, Tokyo, Japan

27 <sup>10</sup>Laboratory of Medical Omics Research, KAZUSA DNA Research Institute, Kisarazu, Chiba,

28 Japan

29 <sup>11</sup>Department of Clinical Application, Center for iPS Cell Research and Application (CiRA),

30 Kyoto University, Kyoto, Japan

31 \*Corresponding author

32

33 **Contact Information**

34 Correspondence to: Hisaya Kato

35 Email: [hisayakato@chiba-u.jp](mailto:hisayakato@chiba-u.jp)

36 Tel: +81-43-226-2092

37

38 **Keywords**

39 Werner syndrome, wound healing, mesenchymal stem cell, iPS cell, aging

40

41 **Abstract**

42 Adult progeria, Werner syndrome (WS), is an autosomal recessive disorder that develops  
43 accelerated aging-associated symptoms after puberty. Refractory skin ulcer of limbs, which is one  
44 of the symptoms specific to WS, is seriously painful and sometimes results in amputation. In  
45 recent years, cell therapy using mesenchymal stem cells (MSCs) has been attracting attention;  
46 however, the effect of WS-derived MSCs on skin ulcers is still unclear. In this study, we generated  
47 iPS cells from a patient with WS and a normal subject, differentiated them into MSCs (WS- and  
48 NM-iMSC, respectively), and performed cell therapy to a refractory skin ulcer mouse model. As  
49 a result, WS-iMSC recapitulated premature senescence phenotypes in vitro. Upon subcutaneous  
50 injection around the wounds of mice, WS-iMSC was significantly inferior in wound healing effect  
51 compared to NM-iMSC. Proteome and transcriptome analysis revealed altered expression of  
52 genes related to angiogenesis, inflammation, and proliferation in WS-iMSC with remarkable  
53 downregulation of VEGF, a potent angiogenic factor. In addition, simultaneous administration of  
54 recombinant human VEGF and WS-iMSC improved the wound healing effect in vivo. These

55 results indicate that the expression of angiogenic factors is reduced in WS-iMSC, and its  
56 supplementation restores the wound healing ability. This finding may pave the way to develop the  
57 treatment of intractable skin ulcers of WS.  
58



59 **Introduction**

60 Werner syndrome (WS), caused by mutation of a RecQ type helicase gene *WRN*, is an  
61 autosomal recessive progeroid syndrome that causes various signs of accelerated aging after  
62 puberty, including bilateral cataracts, graying and loss of hair, type 2 diabetes, sarcopenia,  
63 dyslipidemia, arteriosclerosis, and malignant tumors [1, 2]. In addition to these symptoms, WS  
64 patients exhibit disease-specific phenotypes such as calcification of the Achilles tendon,  
65 refractory skin ulcers, and high susceptibility to non-epithelial tumors, e.g., sarcomas and  
66 hematological malignancies [3, 4]. Among those, refractory painful skin ulcers occur in about  
67 70% of WS patients and often lead to amputation of the lower limbs accompanied by severe  
68 pain and osteomyelitis, which result in remarkably reduced patient quality of life [5]. Owing to  
69 the lack of a fundamental cure for this condition, the development of a treatment strategy is  
70 urgently needed.

71

72 Mesenchymal stem cells (MSCs) are somatic stem cells that possess the ability to differentiate  
73 into mesenchymal lineages, such as osteocytes, chondrocytes, and adipocytes [6-8]. MSCs have  
74 been clinically applied for a wide range of diseases and reported to be effective for graft-versus-  
75 host disease, stroke, multiple sclerosis, and diabetic skin ulcers [9-12]. Therefore, the clinical  
76 application of MSCs is considered a promising tool for regenerative medicine [13]. On the other

77 hand, MSCs derived from aged mice reportedly had reduced wound healing effects compared to  
78 those derived from young mice [14]. Related to this issue, previous reports suggested MSCs  
79 derived from human *WRN* knock-out embryonic stem cells exhibited premature senescence  
80 phenotypes [15]. Taken together, although treatment with MSCs may have beneficial effects for  
81 refractory skin ulcers in WS patients, MSCs derived from WS patients are considered to have  
82 decreased wound healing effects than those derived from normal individuals because of  
83 accelerated senescence. However, the effect of MSCs from WS on ulcer treatment remains to be  
84 elucidated.

85

86 To clarify the skin regenerative effect of MSCs from WS, we generated iPS cells from a normal  
87 subject and a patient with WS, differentiated them into MSCs (NM- and WS-iMSC,  
88 respectively), and performed cell transplantation using a refractory skin ulcer mouse model.

89

90 **Results**

91 ***Generation of NM- and WS-iPSC***

92 iPSCs were generated from a normal individual and a patient with WS as previously described  
93 [16]. They showed iPSC-like morphologies and the capability of embryoid body formation  
94 (Supplementary Figure 1A, B). Gene expression analysis revealed the downregulation of  
95 pluripotency genes and upregulation of genes of three germ layers upon differentiation  
96 (Supplementary Figure 1C). Sanger-sequencing showed compound heterozygous *WRN* mutation,  
97 c.3139-1G>C plus c.3446delA, in WS-iPSC (Supplementary Figure 1D). Thus, we successfully  
98 generated NM- and WS-iPSC.

99

100 ***WS-iMSC recapitulated premature senescence phenotypes in vitro***

101 Derivation of iMSCs was conducted according to the previous report with modification [17].  
102 Derived iMSCs exhibited spindle-shaped MSC-like morphologies (Supplementary Figure 2A).  
103 They were positive for CD73, CD90, and CD105 and possessed adipogenic, chondrogenic, and  
104 osteogenic potentials (Supplementary Figure 2B, C). During the long-term culture, WS-iMSC  
105 showed decreased proliferative capacity compared to NM-iMSC (Figure 1A). The analysis of  
106 telomere length displayed shortened telomeres in WS-iMSC (Figure 1B). SA- $\beta$ -gal analysis  
107 disclosed a significantly increased number of senescent cells in WS-iMSC (Figure 1C, D). These

108 results indicate that WS-iMSC recapitulated premature senescence phenotypes in vitro.

109

110 ***WS-iMSC exhibited reduced wound healing effects compared to NM-iMSC***

111 Refractory skin ulcer mouse models were generated by administering streptozotocin (STZ) to  
112 severe combined immunodeficient (SCID) mice and creating a wound on their back, as previously  
113 reported (Figure 2A) [18]. To determine the wound healing effects of iMSCs, NM- and WS-iMSC  
114 suspended in hyaluronic acid were subcutaneously injected into the area around the wound, and  
115 wound sizes were tracked for 14 days. As a result, mice administered NM-iMSC showed  
116 significantly decreased wound size compared to the groups of vehicle and WS-iMSC on day 14  
117 (Figure 2B, C). Consistent with this finding, attenuated epidermal and dermal thickness was  
118 observed in mice administered WS-iMSC (Figure 2D, E, F, G). These results suggest that WS-  
119 iMSC possesses insufficient wound healing effects compared to NM-iMSC.

120

121 ***NM-iMSC facilitated angiogenesis***

122 To assess the angiogenic effects of iMSCs, distributions of mouse Pecam-1 and Vegf expression  
123 in dermal skin sections on day 14 were evaluated using the in situ hybridization method. The  
124 dermis of mice administered NM-iMSC showed increased and decreased expression of Pecam-1  
125 and Vegf, respectively (Figure 3A, B, C). On the other hand, mice administered WS-iMSC and

126 vehicle exhibited opposite outcomes, meaningly expressions of decreased Pecam-1 and  
127 increased Vegf in the dermis (Figure 3A, B, C). Conversely, in the analysis of epidermis,  
128 expression of Vegf was elevated in mice administered NM-iMSC and reduced in those of WS-  
129 iMSC and vehicle (Figure 3D, E). These findings suggest that the angiogenesis was facilitated  
130 by NM-iMSC, while the distribution of Vegf expression in the skin after the administration of  
131 WS-iMSC is distinct from that of NM-iMSC.

132

133 ***NM-iMSC promoted the migratory effect of WS-fibroblasts compared to WS-iMSC in vitro***

134 Fibroblasts are responsible for producing extracellular matrix to promote angiogenesis [19].  
135 Further, fibroblasts have pivotal roles in the wound healing process at the cell proliferation stage  
136 [20]. Rapid migration of fibroblasts to the wound site and their proliferation are major  
137 components in the acceleration of wound healing [21-23]. Thus, we conducted a co-culture  
138 experiment to determine whether co-culturing fibroblasts with NM- or WS-iMSC can promote  
139 their migration ability in vitro using Transwell. As a result, there was no difference in the  
140 migration ability between dermal fibroblasts from a normal subject (NM-fibroblasts) co-  
141 cultured with NM-iMSC and those co-cultured with WS-iMSC (Figure 4A, B). However, the  
142 migration ability of fibroblasts from a WS patient (WS-fibroblasts) was significantly reduced  
143 when co-cultured with WS-iMSC compared to NM-iMSC (Figure 4A, B). These results suggest

144 that WS-iMSC is inferior to NM-iMSC in its ability to secrete factors that promote the  
145 migration of WS-fibroblasts.  
146  
147 ***NM- and WS-iMSC showed distinct secretome regarding wound healing***  
148 MSCs are known to promote angiogenesis and cell proliferation by secreting various cytokines  
149 and chemokines [24, 25]. Based on the above results of co-culture experiments, the secreted  
150 factors from iMSCs were assumed to be associated with fibroblasts migration and wound  
151 healing. Therefore, we carried out a proteome analysis of the culture supernatant of iMSCs to  
152 clarify their wound healing-associated secretome. As a result, WS-iMSC had significantly  
153 increased secretion of the inflammation-related factors; IL-8, MCP-1, Pentraxin3, and MMP-9  
154 compared to NM-iMSC (Figure 5A, B, C). On the other hand, the secretion of proteins related  
155 to cell proliferation, such as Activin A, IGFBP-3, and VEGF, were significantly upregulated in  
156 NM-iMSC (Figure 5A, B, C). Indeed, enzyme-linked immunosorbent assay confirmed  
157 significantly lower VEGF secretion in WS-iMSC than in NM-iMSC (Figure 5D). These  
158 findings suggest that NM-iMSC and WS-iMSC have distinct secretomes associated with wound  
159 healing.  
160  
161 ***Gene expression profiles related to angiogenesis and inflammation were altered in WS-iMSC***

162 Next, we evaluated the transcriptome of NM- and WS-iMSC via RNA-sequence. As a  
163 consequence, we extracted 1,114 and 886 genes that were respectively downregulated or  
164 upregulated in WS-iMSC compared to NM-iMSC (Figure 6A). Enrichment analysis revealed  
165 genes involved in chromosome segregation and cell division were downregulated in WS-iMSC,  
166 while those of anatomical structure morphogenesis and regulation of multicellular organismal  
167 process were upregulated (Figure 6B). Especially, the expression levels of genes associated with  
168 angiogenesis and inflammation, such as VEGFA, CXCL8, etc., were remarkably altered  
169 (Supplementary Table). qRT-PCR confirmed significantly different gene expression profiles of  
170 the above genes between NM- and WS-iMSC (Figure 6C). These findings might be associated  
171 with the attenuated regenerative capacity of the refractory skin ulcer in WS-iMSC.

172

### 173 ***VEGF supplementation improved the wound healing effect of WS-iMSC***

174 VEGF is a potent angiogenic factor and is also essential in wound healing [26, 27]. Since VEGF  
175 expression was reduced in WS-iMSC, we speculated that VEGF supplementation might  
176 improve the wound healing effect of WS-iMSC. Therefore, WS-iMSC and recombinant human  
177 VEGF were co-injected around the wound of the refractory skin ulcer mouse model. As a result,  
178 the wound area on day 10 was significantly reduced in the VEGF injected group (Figure 7A, B)

179 compared to WS-iMSC alone. From these results, the decreased wound healing ability of WS-

180 iMSC might attribute to the deficiency of VEGF secretion.

181



182 **Discussion**

183 In this study, we demonstrated the difference in wound healing efficacy between NM- and WS-  
184 iMSC when administered into a refractory skin ulcer mouse model. WS-iMSC manifested  
185 premature senescence phenotypes in vitro and weaker wound healing effects compared to NM-  
186 iMSC resulting in thinner epidermal and dermal layers in injected mice. Further, mice  
187 administered WS-iMSC had decreased and increased expression of mouse Pecam-1 and Vegf in  
188 the dermis, respectively, and, in contrast, decreased Vegf expression in the epidermis compared  
189 to those administered NM-iMSC. WS-fibroblasts co-cultured with WS-iMSC exhibited reduced  
190 migration ability in vitro compared to those co-cultured with NM-iMSC. The proteome analysis  
191 revealed significantly reduced VEGF secretion in WS-iMSC. The transcriptome analysis also  
192 confirmed significantly lower expression of genes involved in cell proliferation, blood vessels,  
193 and inflammation, including VEGFA, in WS-iMSC. Indeed, VEGF supplementation restored the  
194 wound healing effect of WS-iMSC.

195

196 There are four phases in wound healing: hemostasis, inflammation, proliferation, and  
197 remodeling, and various chemokines and cytokines are secreted in each phase [28]. Among  
198 those, it is well established that VEGF plays one of the most important roles in angiogenesis  
199 [29]. Previous reports suggest that VEGF secreted by myeloid cells and fibroblasts is highly

200 expressed in the dermis in the early stages of wound healing to promote angiogenesis, but its  
201 expression shifts to the epidermis in the late stage as keratinocytes migrate onto granulation  
202 tissue [28-30]. Therefore, the observed difference in our study in the expression distribution of  
203 Vegf in skin sections of mice administered NM- and WS-iMSC might indicate the delayed  
204 progression of the wound healing phase in mice administered WS-iMSC.

205

206 The relationship between VEGF and the therapeutic effects of MSCs has been demonstrated in  
207 several previous studies. Concomitant injection of MSCs and VEGF reduced the infarct size and  
208 preserved ejection fraction in a mouse model of acute myocardial infarction [31]. MSCs  
209 overexpressing VEGF demonstrated to promote the migration of vascular endothelial cells and  
210 increase vascular density and blood flow in hindlimb ischemic mice [32]. Of note, VEGF  
211 proved to be effective in prolonging the MSC survival at the injected site [33]. These findings  
212 not only indicate that VEGF secreted by MSCs plays an important role in promoting  
213 angiogenesis but also suggest a protective effect of VEGF for MSCs. In the present study, RNA  
214 sequencing and proteome analysis revealed significantly lower VEGF expression in WS-iMSC  
215 than in NM-iMSC, and simultaneous injection of VEGF and WS-iMSC improved wound  
216 healing ability. Therefore, the decreased secretion of VEGF in WS-iMSC might have

217 contributed to the delay in wound healing, and its restoration might ameliorate the regenerative

218 ability of WS-iMSC.

219

220 Few reports have described the relationship between VEGF and WS so far. Goto M, et al.

221 reported an increased serum VEGF level in WS patients [34]. Another study indicated that

222 knockdown of the WRN gene under a hypoxic condition led to an increased VEGF expression

223 due to HIF1 $\alpha$  augmentation in HeLa cells [35]. On the other hand, MSCs collected from older

224 people have reportedly decreased VEGF secretion [36]. WS-iMSC showed reduced VEGF

225 secretion in our study, but further studies are needed to elucidate the underlying mechanism.

226

227 In this study, WS-iMSC exhibited reduced treatment capacity to refractory skin ulcers, probably

228 due to the decreased secretion of VEGF. These findings might contribute to the elucidation of

229 disease pathogenesis and the development of novel therapeutic approaches in the near future.

230 **Materials and Methods**

231 *iPSC and iMSC induction and cell culture*

232 Cell culture was performed at 37 °C with 5% CO<sub>2</sub> under humidified air. iPSCs were generated  
233 from a male normal individual and a male patient with WS in their 50s as previously described  
234 [16]. Derivation of iMSCs was conducted according to the previous report with modification [17].  
235 Briefly, embryoid bodies were cultured in collagen type IV-coated plates (Corning, 354416) with  
236 MSC derivation medium (alpha-MEM (Invitrogen), 10% FBS (Hyclone), Antibiotic-Antimycotic  
237 (Gibco, 15240062), 100 nM dexamethasone (Sigma-Aldrich), 50 uM L-ascorbic acid 2-phosphate  
238 sesquimagnesium salt hydrate (Sigma-Aldrich, A8960-5G)). After five days, cells were passaged  
239 on collagen type I (Nitta Gelatin, Cellmatrix Type I-C) fibril-coated plate (defined as passage 0,  
240 population doubling level 0) and cultured in expansion medium (alpha-MEM (Invitrogen), 10%  
241 FBS (Hyclone), Antibiotic-Antimycotic (Gibco, 15240062), non-essential amino acids  
242 (Invitrogen, 11140-050)). The medium change was performed every 3 days. When reaching  
243 subconfluent, cells were passaged at a 1:4 split ratio. To draw the growth curve, 5 × 10<sup>4</sup> of NM-  
244 and WS-iMSC at PDL5 (P3) were seeded on collagen I coated 6 well plates (Iwaki, 4810-010). 5  
245 × 10<sup>4</sup> cells were counted and passaged every 4 to 5 days until P12. Dermal fibroblasts, established  
246 from a male normal individual or a male WS patient in their 40s, were cultured in DMEM (043-  
247 30085, Wako) supplemented with 10% FBS (10270106, Gibco) and antibiotic (15240062, Gibco)

248 in normal culture dishes (TR4002, TrueLine) at 37 °C with 5% CO<sub>2</sub>. The cells at subconfluency  
249 were passaged at a ratio of 1:4, and those with population doublings (PD) of 8 to 18 were used in  
250 the experiment.

251

### 252 ***Fluorescence-activated cell sorting (FACS)***

253 Surface markers of MSCs were analyzed by flow cytometer (BD FACSCanto II). In detail, MSCs  
254 were dispersed using Trypsin-EDTA (Gibco, 25200072) and suspended in PBS with 2mM EDTA  
255 and 0.5% BSA (Sigma, A3294-50G). Cells were incubated with primary antibodies (anti-CD73  
256 (BD Biosciences, 550257), anti-CD90 (BD Biosciences, 555595), and anti-CD105 (eBioscience,  
257 17-1057-42)) for 30 min at room temperature and analyzed.

258

### 259 ***Tri-lineage differentiation***

260 In vitro differentiation potentials of MSCs into three lineages were evaluated by using  
261 adipogenesis, chondrogenesis, and osteogenesis differentiation kit (A1007001, A1007101, and  
262 A1007201, respectively. All from Gibco) according to the manufacturer's protocols. For each  
263 assay, oil red o, alcian blue, and alizarin red stainings (All Sigma) were used, respectively.

264

### 265 ***Relative telomere length measurement***

266 For the analysis of the relative telomere length, genomic qPCR was conducted using the SYBR

267 Green PCR master mix (Applied Biosystems), as previously described [37].

268

#### 269 ***Senescence-associated $\beta$ -galactosidase staining***

270 Senescence-associated  $\beta$ -galactosidase (SA- $\beta$ -Gal) staining was performed following the

271 manufacturer's instruction (Cell Signaling, 9860S). After staining the nuclear DNA using Hoechst

272 33,342 (DOJINDO, 346-07951), the positive rate was calculated.

273

#### 274 ***Breeding environment***

275 Mice were housed under a temperature of  $24 \pm 2^\circ\text{C}$  and humidity of  $55 \pm 5\%$ , with light exposure

276 from 6:00-18:00 (12-hour automatic lighting). Aspen chips were placed in the plastic cage as

277 bedding, and mice were fed CE-2 (Oriental Yeast Co. Ltd.), a solid feed for mice.

278

#### 279 ***Preparation of refractory skin ulcer model mice and administration of iMSC***

280 Diabetes mellitus was induced in six-week-old severe combined immunodeficient (SCID) mice

281 (C.B17/Icr-scidJcl scid/scid, CLEA Japan, Inc.), as previously described [18]. Briefly, mice were

282 administered 150 mg/kg of streptozotocin (STZ; S0130-1G, Sigma-Aldrich). At three days after

283 STZ administration, the blood glucose (BG) was measured, and mice with  $\text{BG} \geq 300$  mg/dl were

284 considered diabetic immunodeficient mice (DM-SCID). Mice that did not reach the BG of 300  
285 mg/dl received a second administration of STZ (150 mg/kg), and their BG was measured three  
286 days later.

287

288 Ten-week-old DM-SCID mice were anesthetized, and a 6-mm wound was created on the skin  
289 using the Disposable Biopsy Punch (BP-60F, Kai Medical). A donut-shaped rubber sheet with  
290 internal and external diameters of 10 mm and 16 mm, respectively, created by cutting out a 1-mm  
291 thick silicone rubber sheet (Kyowa Industries), was sewn around the wound of mice. Perme-roll  
292 (H24R05, Nitto Medical) was applied for wound dressing.

293

294 Three experimental groups of mice were established: vehicle group, normal group, and WS group.  
295 For the vehicle group, 600  $\mu$ l of sodium hyaluronate (6.66 mg/ml, H0603, Tokyo Chemical  
296 Industry) was mixed with 100  $\mu$ l of DMEM (043-30085, Wako Pure Chemical Industries).  
297 Thereafter, a total of 100  $\mu$ l of the mixture was subcutaneously injected around the wound divided  
298 into four points. For the NM and WS groups,  $7.0 \times 10^6$  NM- or WS-iMSC suspended in 100  $\mu$ l of  
299 DMEM was further suspended in 600  $\mu$ l of hyaluronic acid. Thereafter, a total of 100  $\mu$ l of cell  
300 suspension (including  $1.0 \times 10^6$  cells) was injected around the wound divided into four points. The  
301 wound was photographed on days 0, 3, 7, 10, and 14 after the injection, and mice were dissected

302 on day 14. The wound areas were analyzed using the image analysis software, AreaQ. In the  
303 VEGF co-administration experiment, 0.15 ng of human recombinant VEGF (Gibco) were co-  
304 injected with  $1.0 \times 10^6$  cells of WS-iMSC.

305

### 306 ***Immunohistochemical staining***

307 The skin around the wound was isolated with a disposable biopsy punch (6 mm) at the time of  
308 dissection. The isolated skin was then cut into two pieces, one of which was fixed with 4%  
309 paraformaldehyde to prepare a paraffin-embedded section (GenoStaff). After deparaffinization  
310 and rehydration, the prepared slides were immersed in 10 mM citric acid buffer, autoclaved for  
311 antigen activation, and immersed in 3% H<sub>2</sub>O<sub>2</sub>/PBS to inhibit the endogenous peroxidase activity.  
312 After blocking, anti-Cytokeratin 10 antibodies (ab76318, Abcam) and Alexa Flour 594 (1:1000,  
313 A11037, Thermo Fisher) were added to the sections. The sections were sealed with DAPI-  
314 containing Fluoro-KEEPER (12745-74, Nacalai Tesque) and analyzed using the image analysis  
315 software ImageJ.

316

### 317 ***HE staining and Masson's trichrome staining***

318 Paraffin-embedded sections were deparaffinized and rehydrated. Thereafter, the sections were  
319 stained with Mayer's hematoxylin solution (032-14635, Wako). After staining with eosin solution,



320 the sections were lyophilized and sealed. Masson's trichrome staining was performed by  
321 GenoStaff. The sections were analyzed using the image analysis software ImageJ.

322

### 323 *In situ hybridization*

324 In situ hybridization was performed using the RNAscope Duplex Color Assay Kit

325 (RNAscope<sup>®</sup>2.5 HD Duplex Reagent Kit, 322430, ACD), according to the product protocol.

326 After baking at 60 °C in a HybEZ oven (HybEZ<sup>™</sup> Hybridization System With EZ-Batch Slide

327 System, 321461, ACD), the slides were deparaffinized and rehydrated. After treated with H<sub>2</sub>O<sub>2</sub>,

328 the slides were immersed in RNAscope<sup>®</sup> Target Retrieval Reagent (322000, ACD) heated to 100-

329 104 °C for 15 min for antigen activation. Protease treatment of the sections by using Protease Plus

330 was performed at 40 °C for 30 min. The mixture probe, prepared by mixing RNAscope<sup>®</sup> Probe-

331 Mm-Vegfa-ver2 (412261, ACD) and RNAscope<sup>®</sup> Probe-Mm-Pecam1-C2 (316721-C2, ACD) at

332 a ratio of 50:1, was added to the sections for hybridization at 40 °C for 2 h. The signal was further

333 amplified by incubation. The Pecam-1 and VEGF signals were stained with red and blue,

334 respectively. The sections were analyzed using the image analysis software ImageJ.

335

336 ***Transwell migration assay***

337 NM- and WS-iMSC were seeded at a density of  $6.0 \times 10^4$  cells/well in 24-well plates. After  
338 culturing for 24 h, a culture insert (for 24-well plates,  $8.0 \mu\text{m}$ , 353097, Corning) was attached to  
339 each well, and  $2.0 \times 10^4$  NM- or WS-fibroblasts were seeded on the insert. After 24 h, cells on  
340 top of the insert were removed with a cotton swab, and cells migrated into the bottom of the  
341 insert were fixed with 4% paraformaldehyde. The membrane of the insert was removed and  
342 attached to a slide, and finally sealed with a DAPI-containing Fluoro-KEEPER. The analysis  
343 was performed using the image analysis software ImageJ.

344

345 ***Proteome analysis and Enzyme-linked immunosorbent assay (ELISA)***

346 NM- and WS-iMSC were trypsinized and seeded at a density of  $1.5 \times 10^5$  cells/well in 12-well  
347 plates. After culturing for 24 h, the medium was replaced with 1 ml of MEM $\alpha$ , and cells were  
348 cultured for another 24 h. Thereafter, the culture supernatant was collected and stored at  $-80 \text{ }^\circ\text{C}$ .  
349 For analysis, the Proteome Profiler Human Angiogenesis Array Kit (511-61901, Wako) was used  
350 according to the protocol. Blotted membrane was analyzed using ChemiDoc<sup>TM</sup>MP (BIO-RAD)  
351 and Image Lab. By using the same samples, we carried out an ELISA, according to the protocol  
352 of the VEGF Human ELISA Kit (ab100662, Abcam).

353

354 ***Gene expression analysis***

355 A total of 100,000 NM- and WS-iMSC collected in 1.5-ml tubes were pelleted for storage at -  
356 80 °C. RNA was extracted from the cells by using TRIzol<sup>(R)</sup> Reagent (15596026, ambion),  
357 according to the protocol of the PureLink<sup>TM</sup> RNA Micro Scale Kit (12183016, Thermo Fisher).  
358 RNA sequencing was performed by the Kazusa DNA Research Institute. The obtained FASTQ  
359 file was mapped to the human genome, GRCh38.99, using STAR (ver.2.7.6a) and RSEM  
360 (ver.1.3.3) to obtain the BAM file. The obtained gene count data were analyzed using iDEP [38].  
361 Gene clustering was performed by analyzing the top 2,000 genes with variable expression by  
362 using k-Means. For qRT-PCR, cDNA was synthesized as previously described [39]. Following  
363 probes were used (all from TaqMan); VEGFA, Hs00900055\_m1; PDGFB, Hs00966522\_m1;  
364 FGFR2, Hs01552926\_m1; KDR, Hs00911700\_m1; IGF2, Hs01005963\_m1; CXCL8,  
365 Hs00174103\_m1; FGF1, Hs01092738\_m1; FLT1, Hs01052961\_m1; MMP1, Hs00899658\_m1;  
366 CCL2, Hs00234140\_m1; GAPDH, Hs02786624\_g1 (internal control).

367

368 ***Study approval***

369 All experiments were approved by the institutional review boards at the Chiba University  
370 Graduate School of Medicine (Chiba, Japan). Written informed consent was obtained from  
371 study participants before the commencement of this research.

372

373 **Author Contributions**

374 S.F. and H.Kato designed the study, carried out the experiments, analyzed the data, wrote the  
375 manuscript, and composed the figures; H.Kaneko, K.K., D.S., A.T.W., T.M., and Y.B., carried  
376 out the experiments; M.K., A.S., Y.O., A.I., N.T., and K.E. discussed the data; Y.E. conducted  
377 transcriptome analysis; Y.M. and K.Y. designed the study, discussed the data, and managed  
378 funding; all authors approved the final version of the manuscript.

379

380 **Acknowledgments**

381 This work was supported by Japan Society for the Promotion of Science (JSPS) KAKENHI  
382 under Grant Numbers JP19K23939 (H.Kato), JP20H00524 (K.Y.), JP20K16542 (H.Kato);  
383 Japan Agency for Medical Research and Development (AMED) under Grant Numbers  
384 JP20bm0804016 (K.Y.), JP20ek0109353 (K.Y.), JP20gm5010002 (K.Y.); Ministry of Health,  
385 Labour and Welfare (MHLW) of Japan under Grant Number H30-nanchi-ippan-009 (K.Y.).

386

387 **Conflicts of Interest**

388 All authors declare no potential conflicts of interest in association with this work.

389

390 **References**

- 391 1. Takemoto, M., et al., *Diagnostic criteria for Werner syndrome based on Japanese*  
392 *nationwide epidemiological survey*. Geriatr Gerontol Int, 2013. **13**(2): p. 475-81.
- 393 2. Yokote, K., et al., *WRN Mutation Update: Mutation Spectrum, Patient Registries, and*  
394 *Translational Prospects*. Hum Mutat, 2017. **38**(1): p. 7-15.
- 395 3. Oshima, J., J.M. Sidorova, and R.J. Monnat, Jr., *Werner syndrome: Clinical features,*  
396 *pathogenesis and potential therapeutic interventions*. Ageing Res Rev, 2017. **33**: p. 105-  
397 114.
- 398 4. Onishi, S., et al., *Japanese diabetic patients with Werner syndrome exhibit high*  
399 *incidence of cancer*. Acta Diabetol, 2012. **49 Suppl 1**(Suppl 1): p. S259-60.
- 400 5. Koshizaka, M., et al., *Time gap between the onset and diagnosis in Werner syndrome: a*  
401 *nationwide survey and the 2020 registry in Japan*. Aging-U.S., 2020. **12**(24): p. 24940-  
402 24956.
- 403 6. Harris, R.G., et al., *Lack of a fusion requirement for development of bone marrow-*  
404 *derived epithelia*. Science, 2004. **305**(5680): p. 90-3.
- 405 7. Volarevic, V., et al., *Concise review: Mesenchymal stem cell treatment of the*  
406 *complications of diabetes mellitus*. Stem Cells, 2011. **29**(1): p. 5-10.
- 407 8. Petersen, B.E., et al., *Bone marrow as a potential source of hepatic oval cells*. Science,

- 408           1999. **284**(5417): p. 1168-70.
- 409    9.       Wang, L., et al., *Efficacy and safety of mesenchymal stromal cells for the prophylaxis of*
- 410           *chronic graft-versus-host disease after allogeneic hematopoietic stem cell*
- 411           *transplantation: a meta-analysis of randomized controlled trials*. Ann Hematol, 2018.
- 412           **97**(10): p. 1941-1950.
- 413    10.      Petrou, P., et al., *Beneficial effects of autologous mesenchymal stem cell transplantation*
- 414           *in active progressive multiple sclerosis*. Brain, 2020.
- 415    11.      Chen, L., et al., *Multiple cell transplantation based on an intraparenchymal approach*
- 416           *for patients with chronic phase stroke*. Cell Transplant, 2013. **22 Suppl 1**: p. S83-91.
- 417    12.      Lu, D., et al., *Long-Term Outcomes of BMMSC Compared with BMMNC for Treatment*
- 418           *of Critical Limb Ischemia and Foot Ulcer in Patients with Diabetes*. Cell Transplant,
- 419           2019. **28**(5): p. 645-652.
- 420    13.      Han, Y., et al., *Mesenchymal Stem Cells for Regenerative Medicine*. Cells, 2019. **8**(8): p.
- 421           886.
- 422    14.      Bruna, F., et al., *Regenerative Potential of Mesenchymal Stromal Cells: Age-Related*
- 423           *Changes*. Stem Cells Int, 2016. **2016**: p. 1461648.
- 424    15.      Zhang, W., et al., *Aging stem cells. A Werner syndrome stem cell model unveils*
- 425           *heterochromatin alterations as a driver of human aging*. Science, 2015. **348**(6239): p.

- 426 1160-3.
- 427 16. Kato, H., et al., *Generation of disease-specific and CRISPR/Cas9-mediated gene-*  
428 *corrected iPS cells from a patient with adult progeria Werner syndrome*. Stem Cell  
429 Research, 2021. **53**: p. 102360.
- 430 17. Liu, Y., et al., *One-step derivation of mesenchymal stem cell (MSC)-like cells from*  
431 *human pluripotent stem cells on a fibrillar collagen coating*. PLoS One, 2012. **7**(3): p.  
432 e33225.
- 433 18. Kinoshita, K., et al., *Therapeutic Potential of Adipose-Derived SSEA-3-Positive Muse*  
434 *Cells for Treating Diabetic Skin Ulcers*. Stem Cells Transl Med, 2015. **4**(2): p. 146-55.
- 435 19. Newman, A.C., et al., *The requirement for fibroblasts in angiogenesis: fibroblast-*  
436 *derived matrix proteins are essential for endothelial cell lumen formation*. Mol Biol  
437 Cell, 2011. **22**(20): p. 3791-800.
- 438 20. Desmouliere, A., et al., *Fibroblasts and myofibroblasts in wound healing*. Clinical,  
439 Cosmetic and Investigational Dermatology, 2014. **Volume 7**: p. 301-311.
- 440 21. Dunnill, C., et al., *Reactive oxygen species (ROS) and wound healing: the functional*  
441 *role of ROS and emerging ROS-modulating technologies for augmentation of the*  
442 *healing process*. Int Wound J, 2017. **14**(1): p. 89-96.
- 443 22. Broughton, G., J.E. Janis, and C.E. Attinger, *The basic science of wound healing*. Plast

- 444           Reconstr Surg, 2006. **117**(7 Suppl): p. 12S-34S.
- 445    23.    DeLisser, H.M., *Modulators of endothelial cell filopodia: PECAM-1 joins the club*. Cell
- 446           Adh Migr, 2011. **5**(1): p. 37-41.
- 447    24.    Madrigal, M., K.S. Rao, and N.H. Riordan, *A review of therapeutic effects of*
- 448           *mesenchymal stem cell secretions and induction of secretory modification by different*
- 449           *culture methods*. J Transl Med, 2014. **12**: p. 260.
- 450    25.    Ren, G., et al., *Concise review: mesenchymal stem cells and translational medicine:*
- 451           *emerging issues*. Stem Cells Transl Med, 2012. **1**(1): p. 51-8.
- 452    26.    Ferrara, N., H.P. Gerber, and J. LeCouter, *The biology of VEGF and its receptors*. Nat
- 453           Med, 2003. **9**(6): p. 669-76.
- 454    27.    Bao, P., et al., *The role of vascular endothelial growth factor in wound healing*. J Surg
- 455           Res, 2009. **153**(2): p. 347-58.
- 456    28.    Sun, B.K., Z. Siprashvili, and P.A. Khavari, *Advances in skin grafting and treatment of*
- 457           *cutaneous wounds*. Science, 2014. **346**(6212): p. 941-5.
- 458    29.    Johnson, K.E. and T.A. Wilgus, *Vascular Endothelial Growth Factor and Angiogenesis*
- 459           *in the Regulation of Cutaneous Wound Repair*. Adv Wound Care (New Rochelle), 2014.
- 460           **3**(10): p. 647-661.
- 461    30.    Brown, L.F., et al., *Expression of vascular permeability factor (vascular endothelial*



- 462            *growth factor) by epidermal keratinocytes during wound healing. J Exp Med, 1992.*
- 463            **176**(5): p. 1375-9.
- 464    31.    Deuse, T., et al., *Hepatocyte growth factor or vascular endothelial growth factor gene*
- 465            *transfer maximizes mesenchymal stem cell-based myocardial salvage after acute*
- 466            *myocardial infarction. Circulation, 2009. 120*(11 Suppl): p. S247-54.
- 467    32.    Beegle, J.R., et al., *Preclinical evaluation of mesenchymal stem cells overexpressing*
- 468            *VEGF to treat critical limb ischemia. Mol Ther Methods Clin Dev, 2016. 3*: p. 16053.
- 469    33.    Pons, J., et al., *VEGF improves survival of mesenchymal stem cells in infarcted hearts.*
- 470            *Biochem Biophys Res Commun, 2008. 376*(2): p. 419-22.
- 471    34.    Goto, M., et al., *Multiplex cytokine analysis of Werner syndrome. Intractable Rare Dis*
- 472            *Res, 2015. 4*(4): p. 190-7.
- 473    35.    Labbe, A., et al., *The Werner syndrome gene product (WRN): a repressor of hypoxia-*
- 474            *inducible factor-1 activity. Exp Cell Res, 2012. 318*(14): p. 1620-32.
- 475    36.    Zhang, Y., et al., *Macrophage migration inhibitory factor rejuvenates aged human*
- 476            *mesenchymal stem cells and improves myocardial repair. Aging (Albany NY), 2019.*
- 477            **11**(24): p. 12641-12660.
- 478    37.    O'Callaghan, N.J. and M. Fenech, *A quantitative PCR method for measuring absolute*
- 479            *telomere length. Biol Proced Online, 2011. 13*(1): p. 3.

- 480 38. Ge, S.X., E.W. Son, and R. Yao, *iDEP: an integrated web application for differential*  
481 *expression and pathway analysis of RNA-Seq data*. BMC Bioinformatics, 2018. **19**(1):  
482 p. 534.
- 483 39. Kato, H., et al., *Fibroblasts from different body parts exhibit distinct phenotypes in*  
484 *adult progeria Werner syndrome*. Aging (Albany NY), 2021. **13**(4): p. 4946-4961.
- 485
- 486

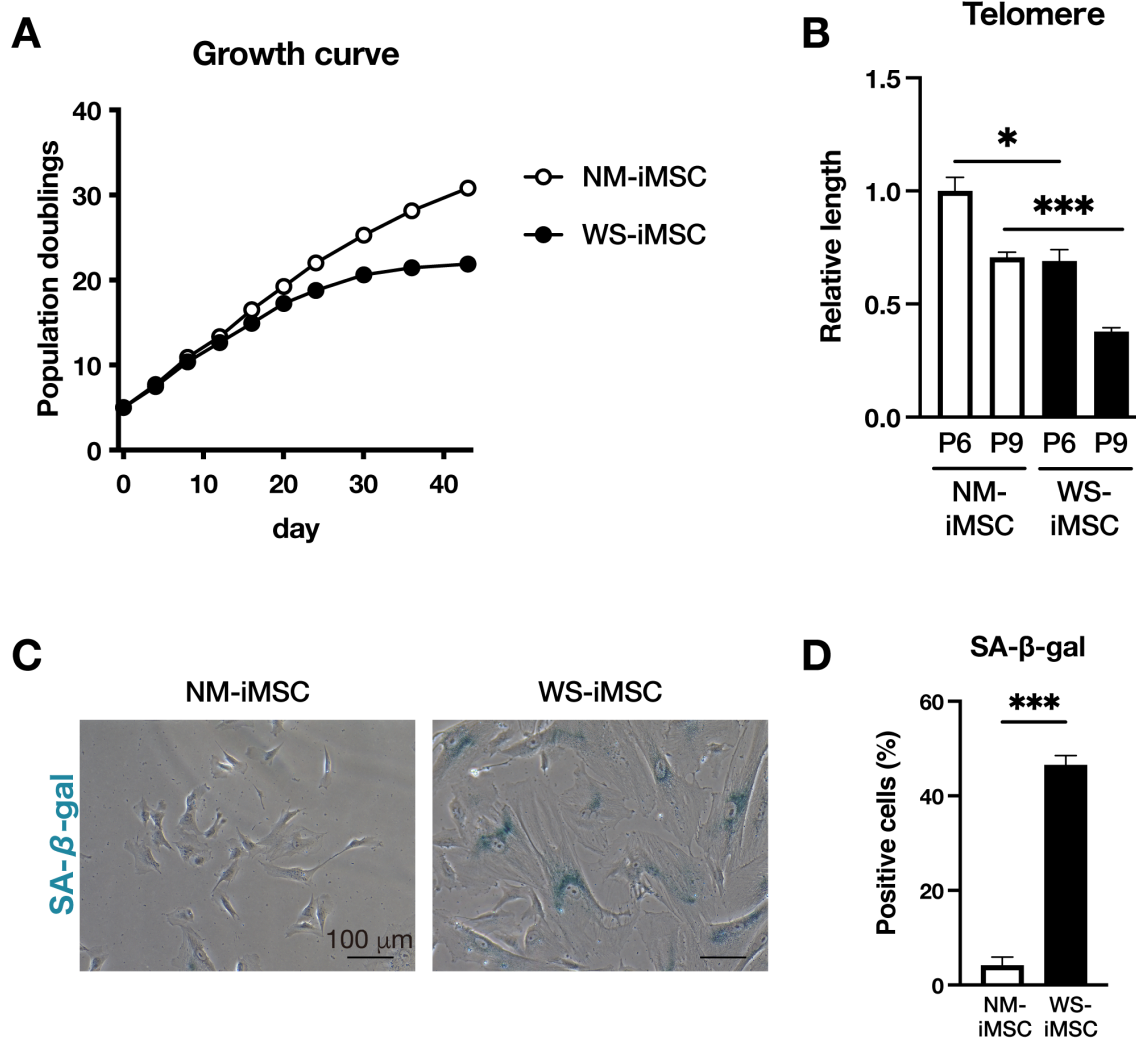

487

488 Figure 1. Premature senescence phenotypes of WS-iMSC.

489 (A) Growth curves of NM- and WS-iMSC. (B) Relative telomere length quantified by qPCR at

490 passages 6 and 9. Data are mean  $\pm$  SEM of three technical replicates. A student t-test was

491 performed (\* $p < 0.05$ , \*\*\* $p < 0.001$ ). (C) Representative images of SA- $\beta$ -gal staining at passage 12.

492 Scale bar = 100  $\mu$ m. (D) The rate of positive cells related to Figure 1C. More than 200 cells in

493 each group were counted. Data are mean  $\pm$  SEM of five microscopic views. A student t-test was

494 performed (\*\*\* $p < 0.001$ ).

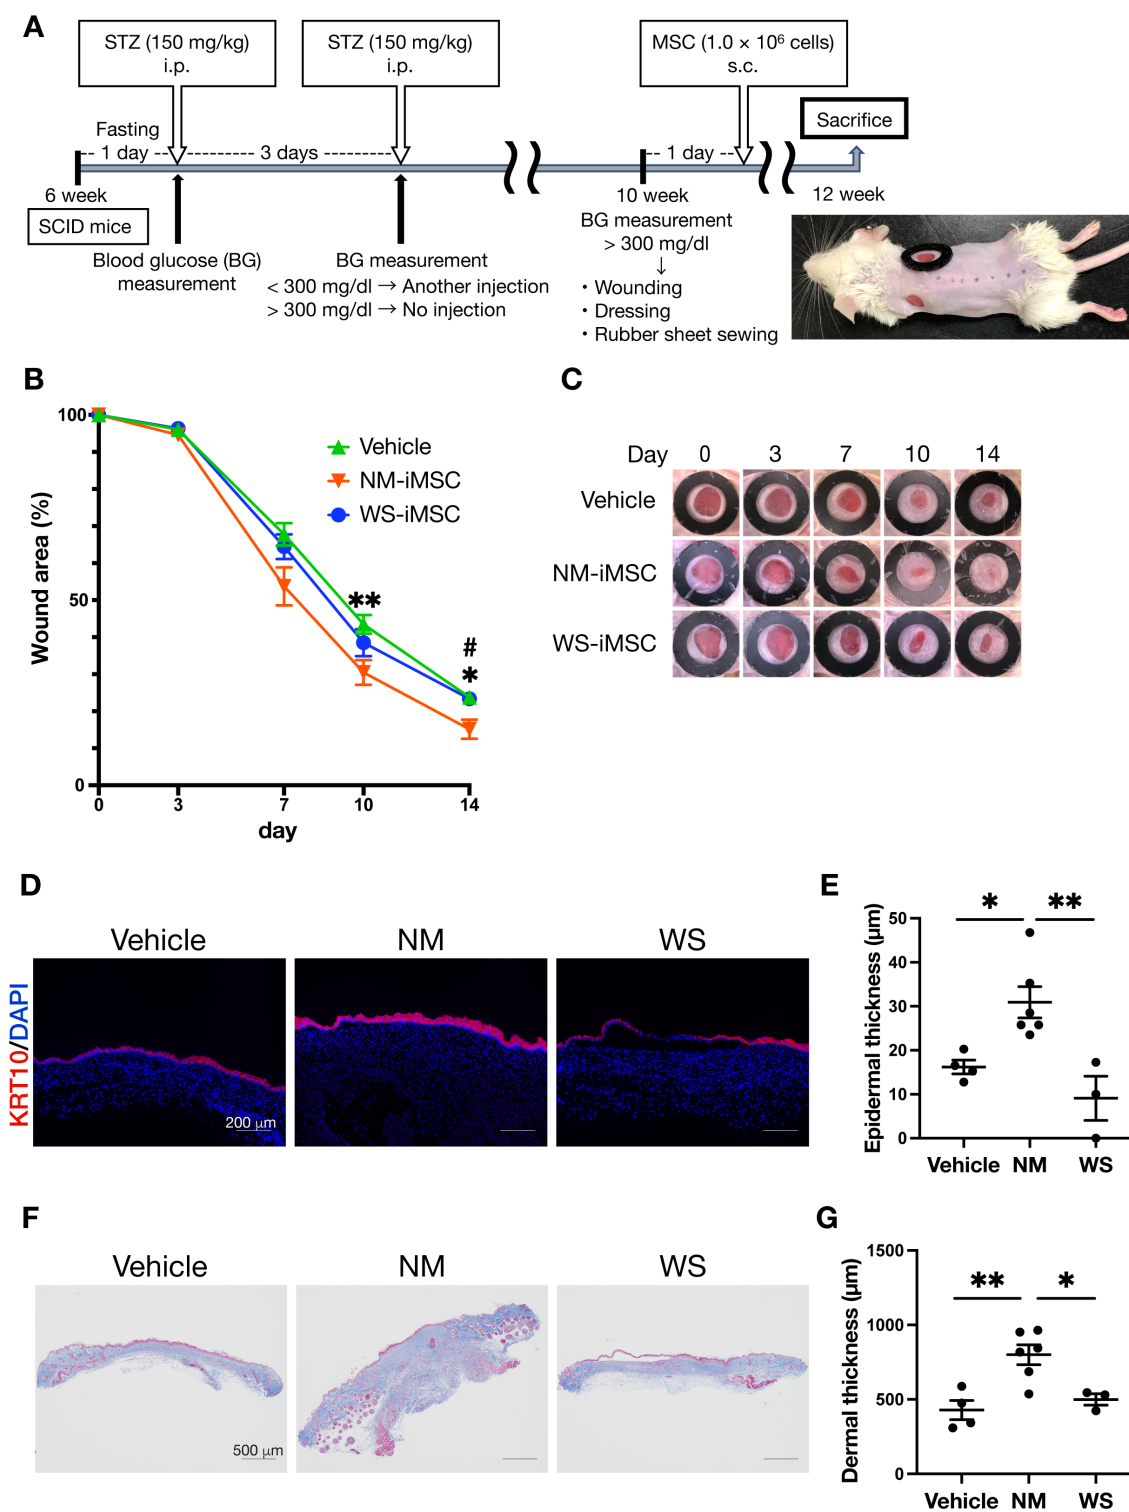

495

496 Figure 2. Wound healing effects of refractory skin ulcer mouse model by administering NM- and

497 WS-iMSC.

498 (A) Scheme representing the production of refractory skin ulcer mouse model and subsequent  
499 experiments. (B) Graph showing the rate of wound area from day 0 to 14. Data are mean  $\pm$  SEM  
500 (Veh, n = 8; NM, n = 10; WS, n = 6). A student t-test was performed (\*p<0.05, \*\*p<0.01, Veh vs  
501 NM-iMSC; #p<0.05, WS-iMSC vs NM-iMSC). (C) Representative pictures of wounds on mice  
502 in each group. (D) Representative images of immunohistochemical staining with KRT10 and  
503 DAPI of mouse skin sections on day 14. (E) Quantification of epidermal thickness related to  
504 Figure 2D. Data are mean  $\pm$  SEM. A student t-test was performed (\*p<0.05, \*\*p<0.01). (F)  
505 Representative images of mouse skin sections stained by Masson's trichrome staining method.  
506 (G) Quantification of dermal thickness related to Figure 2F. Data are mean  $\pm$  SEM. A student t-  
507 test was performed (\*p<0.05, \*\*p<0.01).

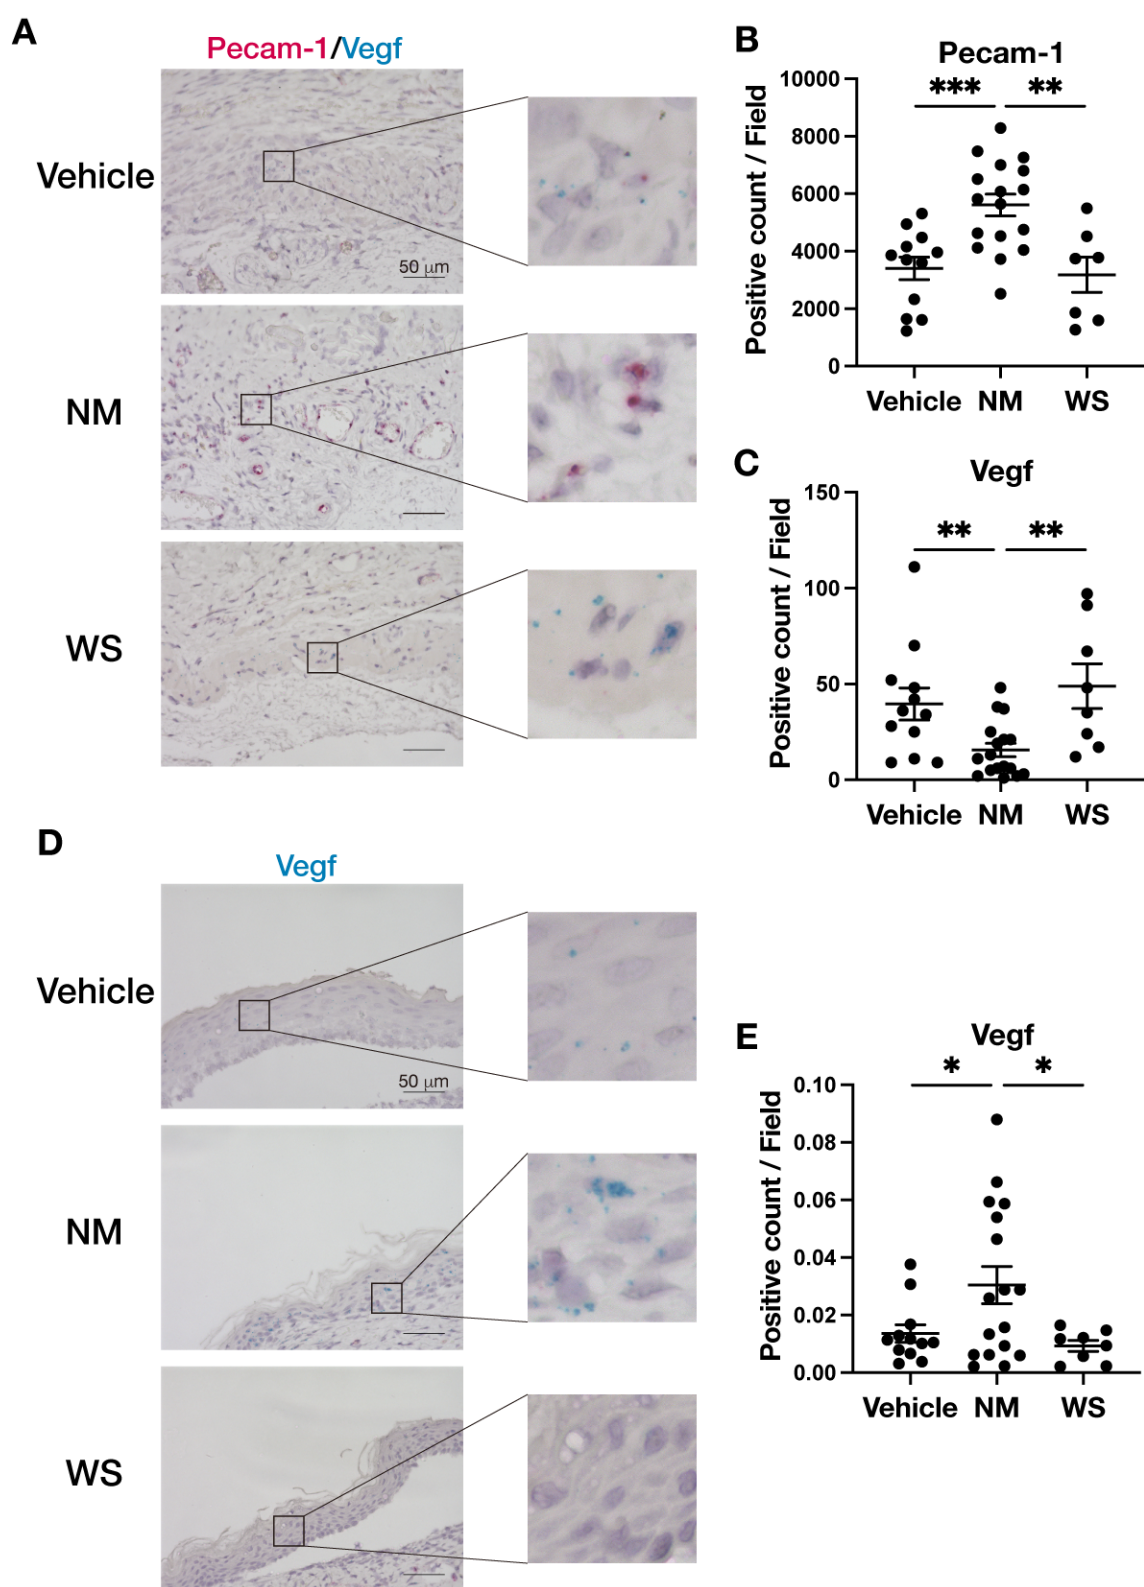

508

509 Figure 3. Analysis of Pecam-1 and Vegf expression in dermis and epidermis by in situ

510 hybridization.

511 (A) Representative images of Pecam-1 (red dots) and Vegf (blue dots) in dermal sections of mice  
512 on day 14. (B), (C) Quantification of dots positive for Pecam-1 (B) and Vegf (C) related to Figure  
513 3A. Data are mean  $\pm$  SEM. A student t-test was performed (\*\* $p < 0.01$ , \*\*\* $p < 0.001$ ). (D)  
514 Representative images Vegf (blue dots) in epidermal sections of mice on day 14. (E)  
515 Quantification of dots positive for Vegf related to Figure 3D. Data are mean  $\pm$  SEM. A student t-  
516 test was performed (\* $p < 0.05$ ).

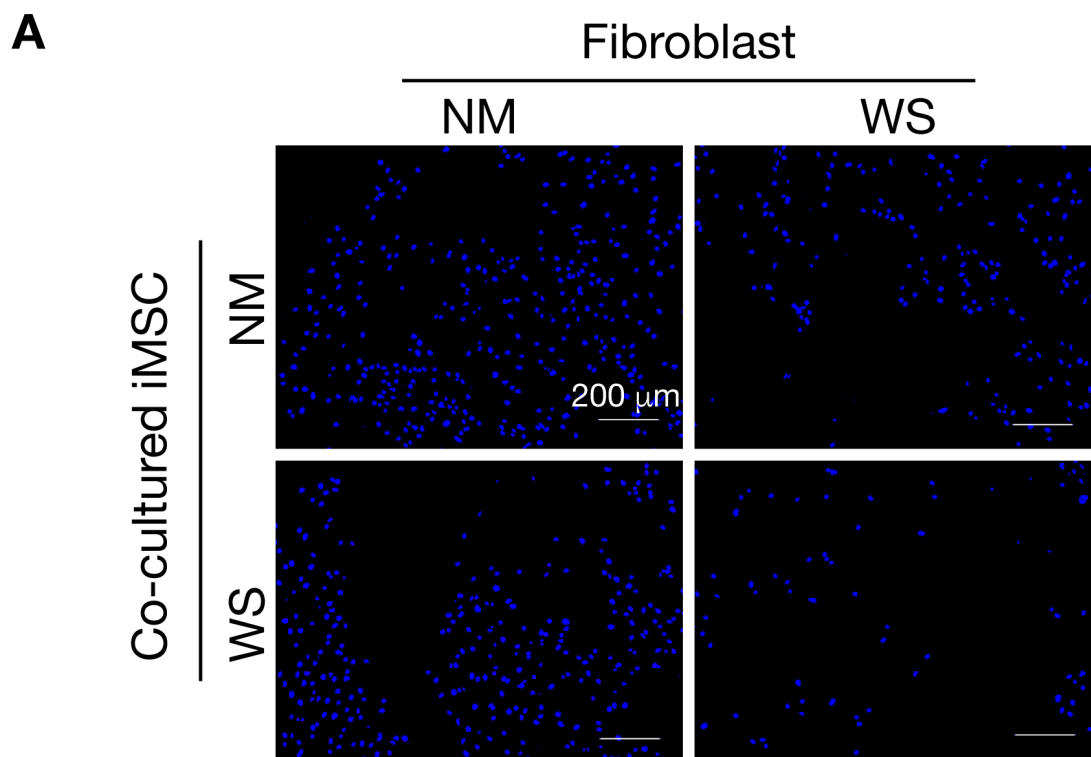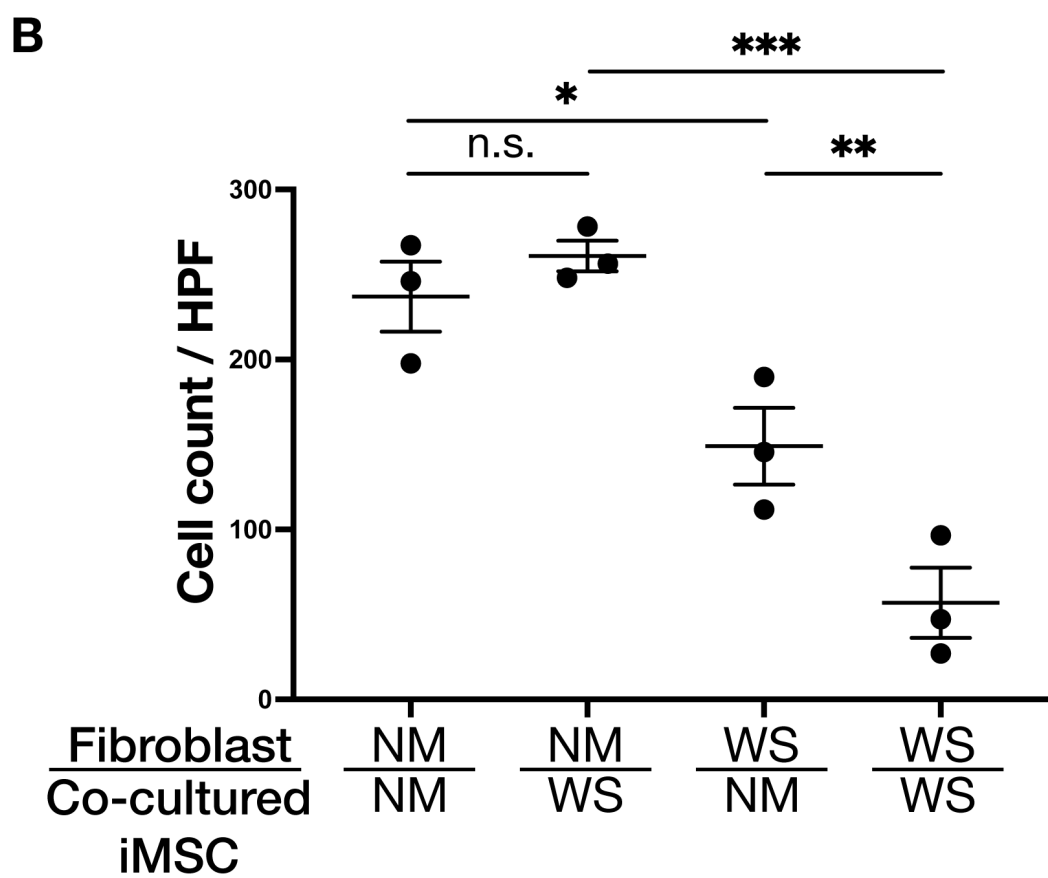



518 Figure 4. Analysis of the migratory ability of fibroblasts co-cultured with NM- and WS-iMSC.  
519 (A) Representative images of fibroblasts that migrated beneath the Transwell chamber stained  
520 with DAPI after 24-hour co-culturing with NM- and WS-iMSC. (B) Quantification of migrated  
521 fibroblasts related to Figure 4A. Data are mean  $\pm$  SEM (n = 3). A student t-test was performed  
522 (n.s., not significant; \*p<0.05; \*\*p<0.01; \*\*\*p<0.001).

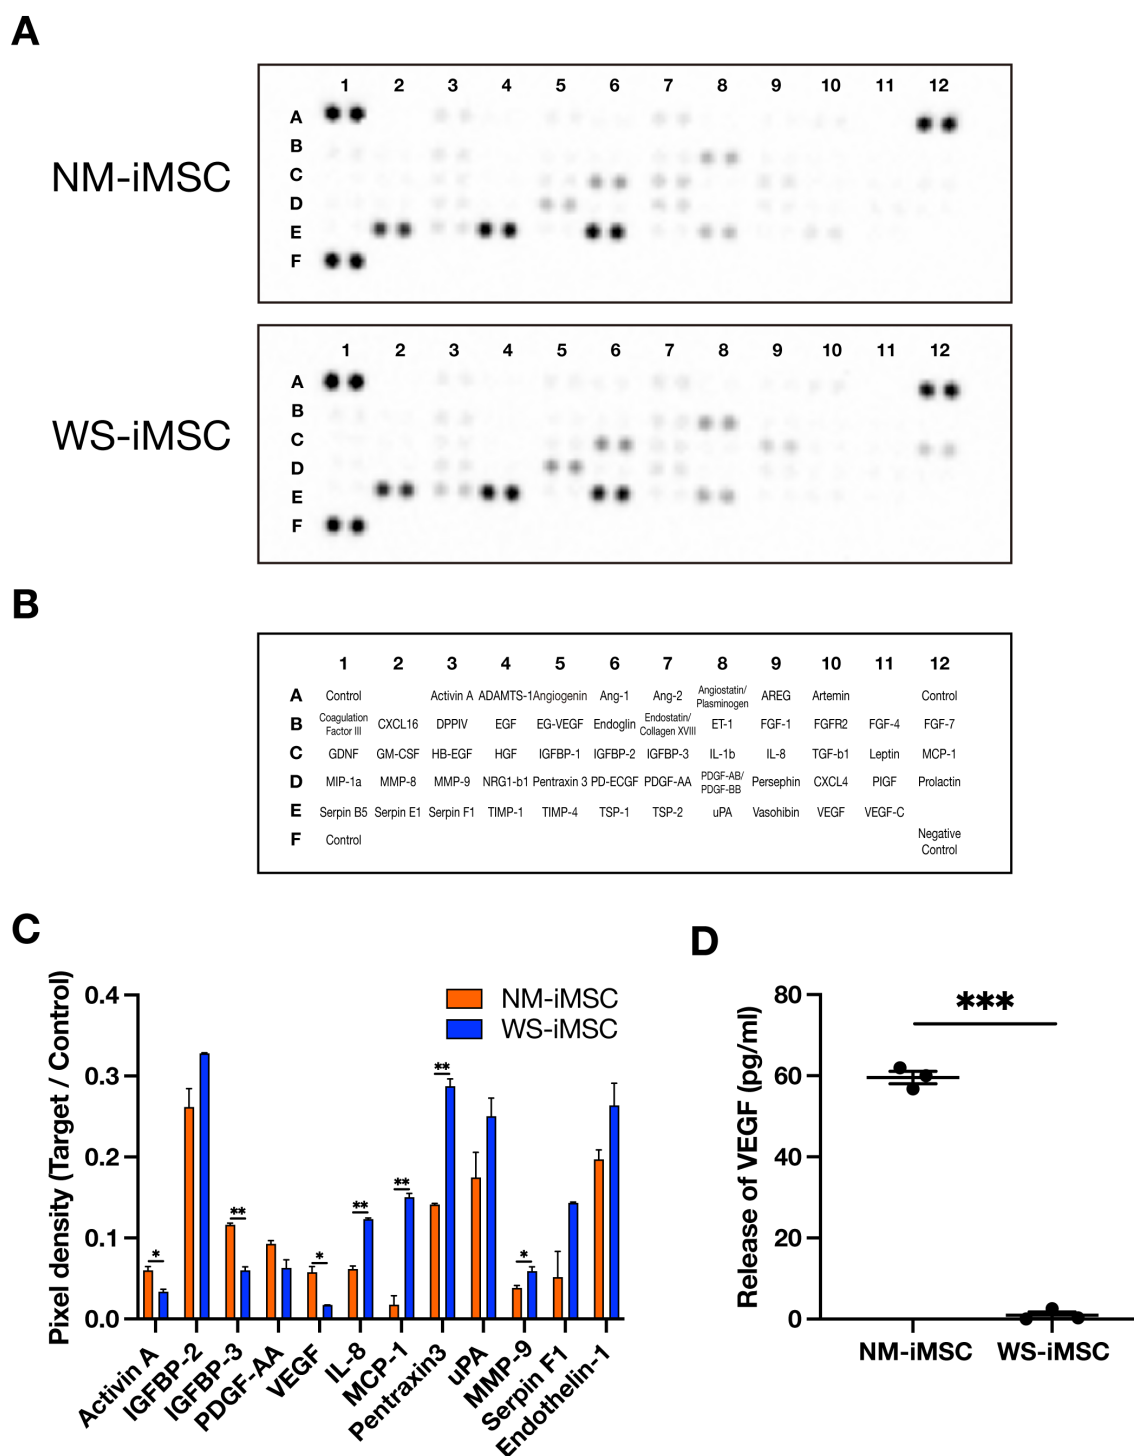

523

524 Figure 5. Analysis of secreted factors in NM- and WS-iMSC conditioned medium.

525 (A) Images of the blotted membrane in proteome analysis of angiogenic factors secreted by NM-

526 and WS-iMSC. (B) Plot table of the membrane in Figure 5A. (C) Quantification of proteome

527 analysis shown in Figure 5A. Data are mean  $\pm$  SEM. A student t-test was performed (\* $p < 0.05$ ;  
 528 \*\* $p < 0.01$ ). (D) The concentration of VEGF in conditioned medium measured by ELISA. Data  
 529 are mean  $\pm$  SEM. A student t-test was performed (\*\* $p < 0.001$ ).

530

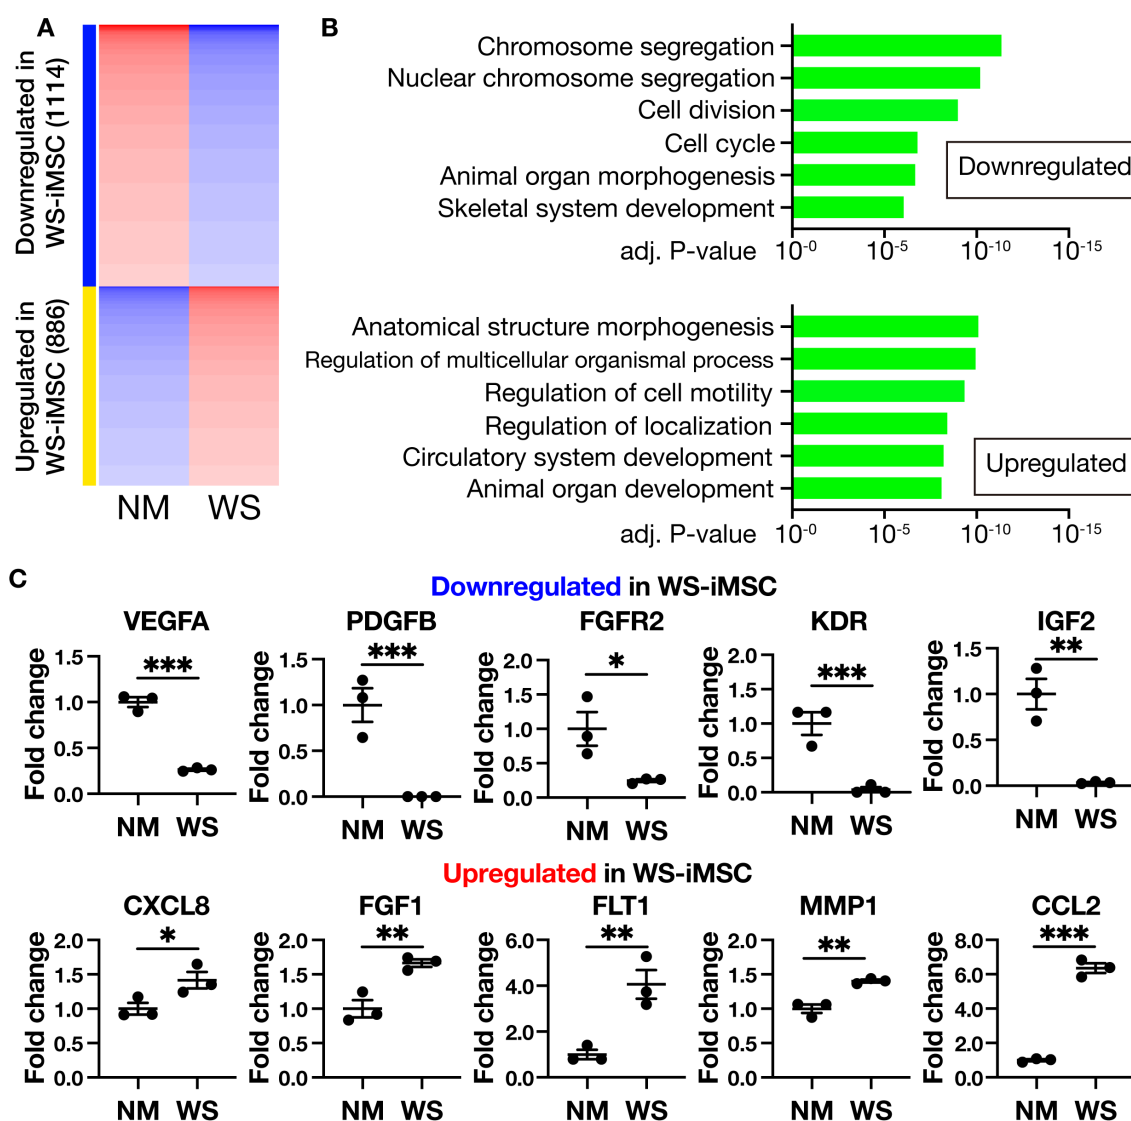

531

532 Figure 6. Gene expression analysis of NM- and WS-iMSC.

533 (A) Heatmap of differentially expressed genes between NM- and WS-iMSC in transcriptome

534 analysis. (B) List of gene ontology (GO: biological process) analysis and corresponding p-values  
535 related to Figure 6A. (C) qRT-PCR results of genes related to cell proliferation, angiogenesis, and  
536 inflammation. Data are means  $\pm$  SEM of three technical replicates. A student t-test was performed  
537 (\* $p < 0.05$ ; \*\* $p < 0.01$ ; \*\*\* $p < 0.001$ ).

538

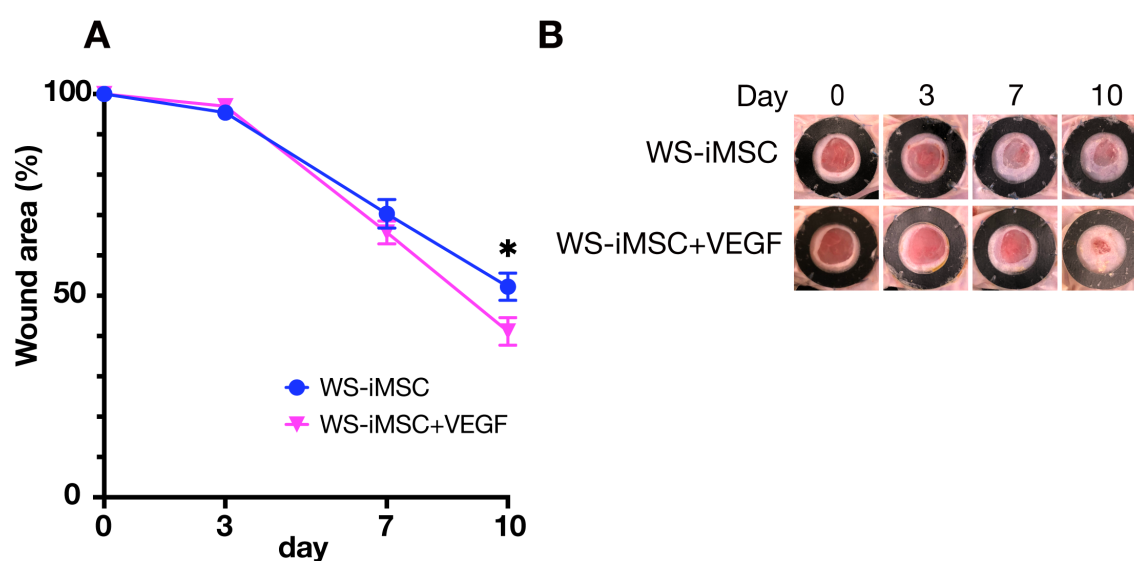

539

540 Figure 7. Wound healing effects of administration of WS-iMSC alone or WS-iMSC plus VEGF  
541 on intractable skin ulcers.

542 (A) Graph showing the rate of wound area from day 0 to 10. Data are mean  $\pm$  SEM (n = 7). A  
543 student t-test was performed (\* $p < 0.05$ ). (B) Representative pictures of wounds on mice in each  
544 group.

545

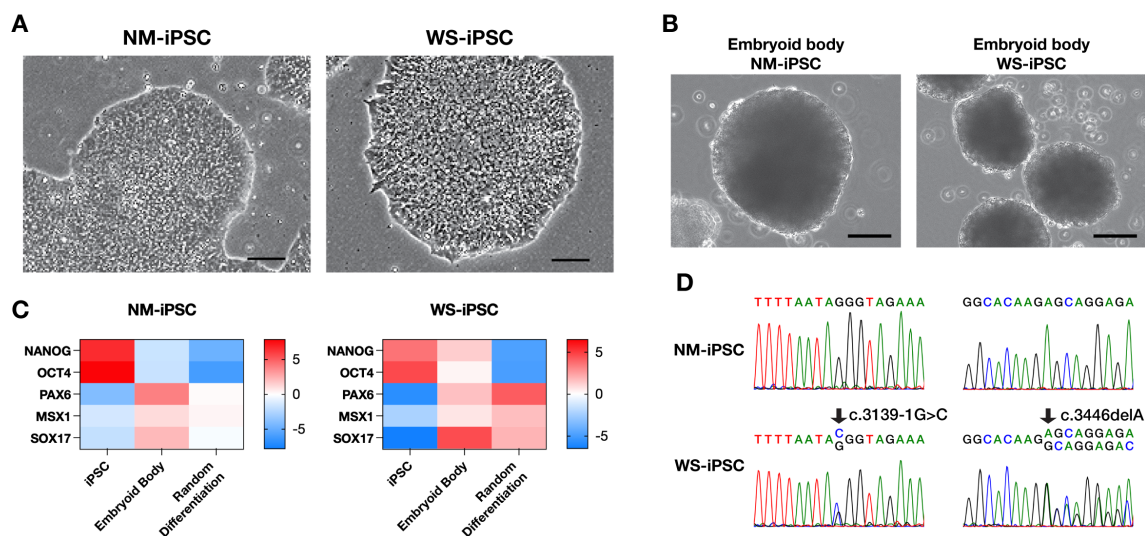

546

547 Supplementary Figure 1. Characteristics of NM- and WS-iPSC.

548 (A) Representative images of iPSCs. Bar = 100 $\mu$ m. (B) Representative images of embryoid bodies.

549 Bar = 100 $\mu$ m. (C) Heatmap of qRT-PCR results assessing genes of pluripotency and three germ

550 layers. (D) Sanger sequencing results at *WRN* mutated locus.

551

552

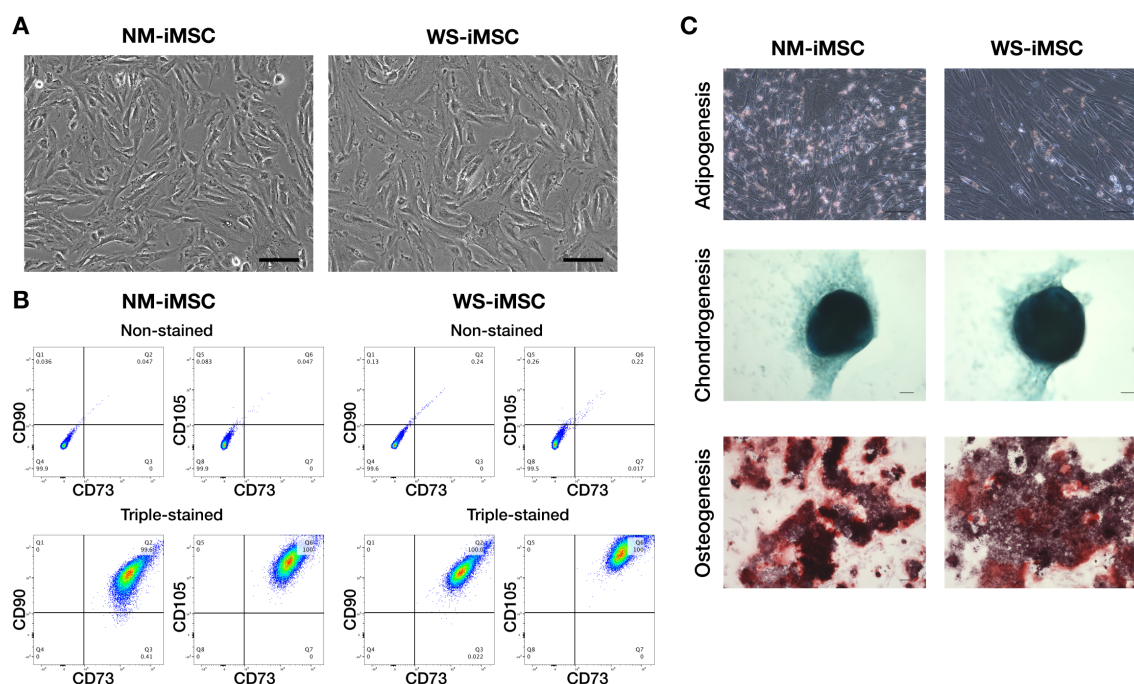

553

554 Supplementary Figure 2. Characteristics of NM- and WS-iMSC.

555 (A) Representative images of iMSCs at PD8. Bar = 100  $\mu$ m. (B) FACS quantification of positive

556 cell rates for cell surface markers specific to MSCs. (C) Representative images of tri-lineage

557 differentiated cells. For staining, oil red O to adipogenesis, alcian blue to chondrogenesis, and

558 alizarin red to osteogenesis were used. Bar = 100  $\mu$ m.

559

560

561 Supplementary Table. A list of the top 2000 genes with the highest SD in RNA-sequence of NM-

562 and WS-iMSC.

563
